# Supplementary material for: Entrapment of enzymes and nanoparticles using biomimetically synthesized silicaElectronic supplementary information (ESI) available: biosilicification reaction, enzyme assays, encapsulation of iron oxide. See http://www.rsc.org/suppdata/cc/b4/b404586f/This work was funded by the Air Force Office of Scientific Research.
Source: Royal Society of Chemistry journal article supplement (doi:10.1039/b404586f), 2004-01-01
Supplement: b404586f.pdf [file b404586f.pdf]

## **EXPERIMENTAL METHODS:**

**Biosilification reactions:** In a typical procedure, R5 peptide (100 mg/ml) and catalase (10mg/ml), horseradish peroxidase (10mg/ml) or nanoparticles were dissolved in sodium phosphate buffer pH 7.5 in a microcentrifuge tube. A freshly prepared solution of tetramethoxysilane in 1 mM HCl was then added to this solution to a final concentration of 0.1 M. The reaction was incubated for 5 min on the benchtop. The precipitate was centrifuged at 14,000 *g* for 5 min. The pellet was then washed several times with sodium phosphate buffer pH 7.5 containing 0.2% Tween-20. The silica precipitate was resuspended and stored in sodium phosphate buffer pH 7.5. In some cases, the silica precipitate was stored as a dry powder. Streptavidin conjugated CdSe@ZnS nanoparticles (QD605) were purchased from Quantum Dot Corporation (USA). Iron oxide nanoparticles were purchased from Aldrich Chemicals. CoPt nanoparticles were synthesized as described.<sup>9</sup>

**Enzyme Assays:** Horseradish peroxidase (HRP) activity was monitored using 2,2'-Azino-bis[3-Ethylbenzthiazoline-6-Sulfonic acid] (ABTS) as substrate. ABTS is a widely used substrate for peroxidase and produces a green colored product that can be read spectrophotometrically at 405 nm. The activity of the immobilized catalase was monitored using hydrogen peroxide as a substrate. The decomposition of H<sub>2</sub>O<sub>2</sub> into water and oxygen by catalase can be measured by a decrease in absorbance at 240 nm.

## **SUPPLEMENTAL FIGURES:**

**Fig S1.** Reusability of the entrapped enzyme. The catalase entrapped silica matrix can be reused several times by separating the silica matrix from the product by centrifugation (10,000 *x g* for 5 min), washing the matrix with buffer several times and then repeating.

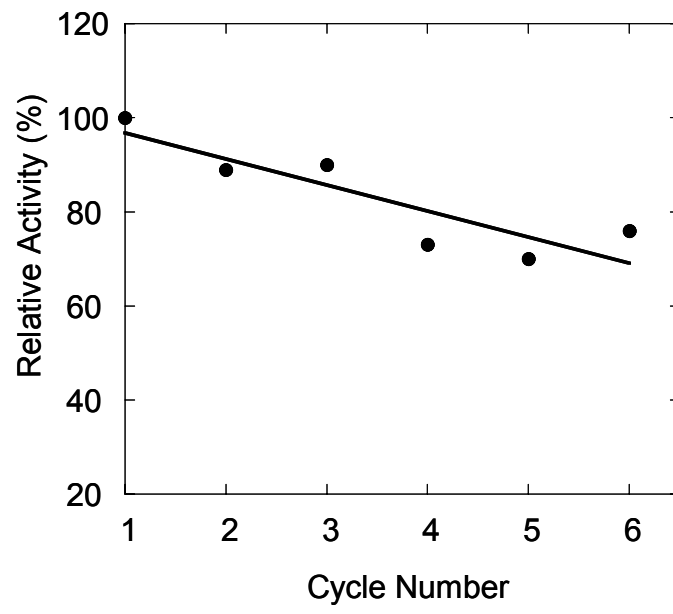

**Fig. S1**
